# Supplementary material
Source: PubMed Central journal article supplement (PMC2662349)
Supplement: NIHMS94505-supplement-SI.pdf [file NIHMS94505-supplement-SI.pdf]

# Supporting Information

## Electrochemical Detection of Glutathione Using Redox Indicators

*Eden Joy Pacsial-Ong, Robin L. McCarley,<sup>\*</sup> Weihua Wang, and Robert M. Strongin*

Department of Chemistry and Center for Biomodular Multiscale Systems

Louisiana State University, 232 Choppin Hall, Baton Rouge, LA 70803-1804

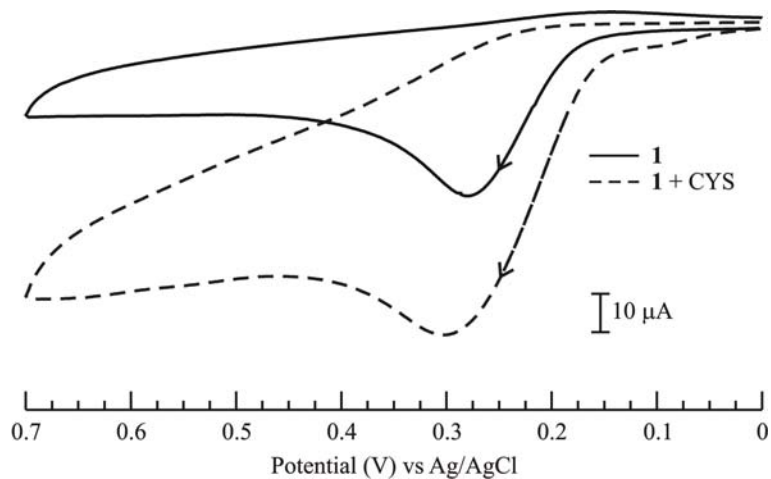

**Figure S-1.** Cyclic voltammograms detailing the response of  $1.0 \times 10^{-3}$  M **1** before (solid line) and after (dashed line) the addition of CYS ( $1.0 \times 10^{-2}$  M) in 70:30 MeOH/H<sub>2</sub>O (0.050 M phosphate buffer, pH 7.3) solution,  $\nu = 0.1 \text{ V}\cdot\text{s}^{-1}$ . Arrows indicated the direction of the voltammetric scan.

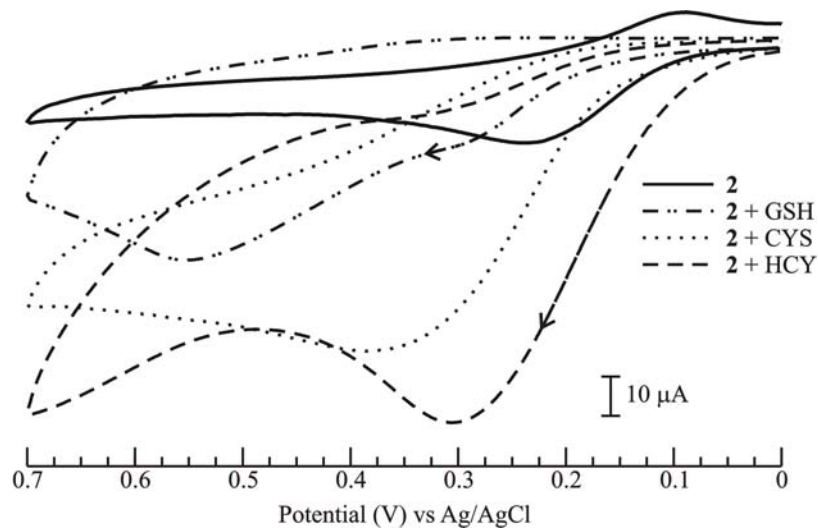

**Figure S-2.** Cyclic voltammetric response of  $1.0 \times 10^{-3}$  M **2** before and after the addition of GSH, CYS, and HCY ( $1.0 \times 10^{-2}$  M each) in 70:30 MeOH/H<sub>2</sub>O (0.050 M phosphate buffer, pH 7.3) solution,  $\nu = 0.1 \text{ V}\cdot\text{s}^{-1}$ .

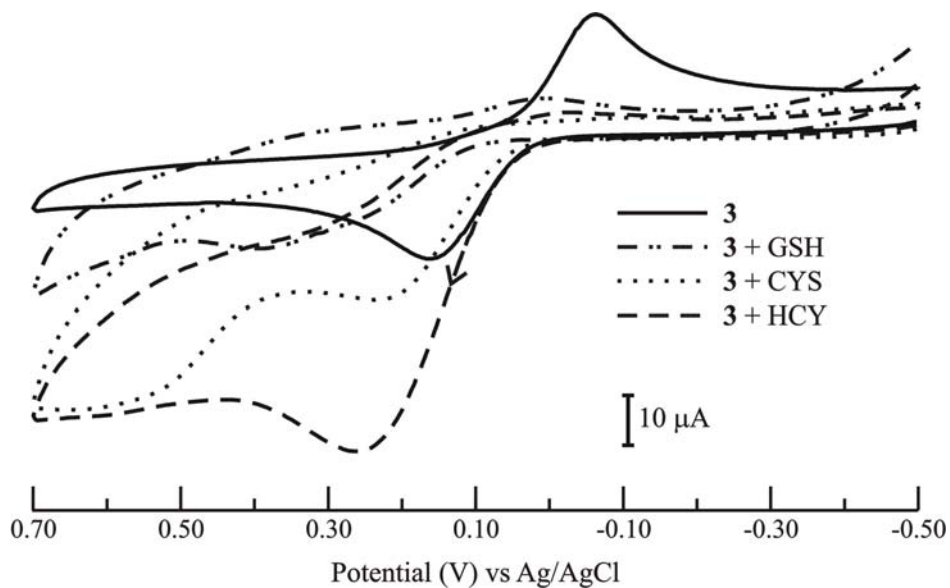

**Figure S-3.** Cyclic voltammetric response of  $1.0 \times 10^{-3}$  M **3** before and after the addition of GSH, CYS, and HCY ( $1.0 \times 10^{-2}$  M each) in 70:30 MeOH/H<sub>2</sub>O (0.050 M phosphate buffer, pH 7.3) solution,  $\nu = 0.1 \text{ V}\cdot\text{s}^{-1}$ .

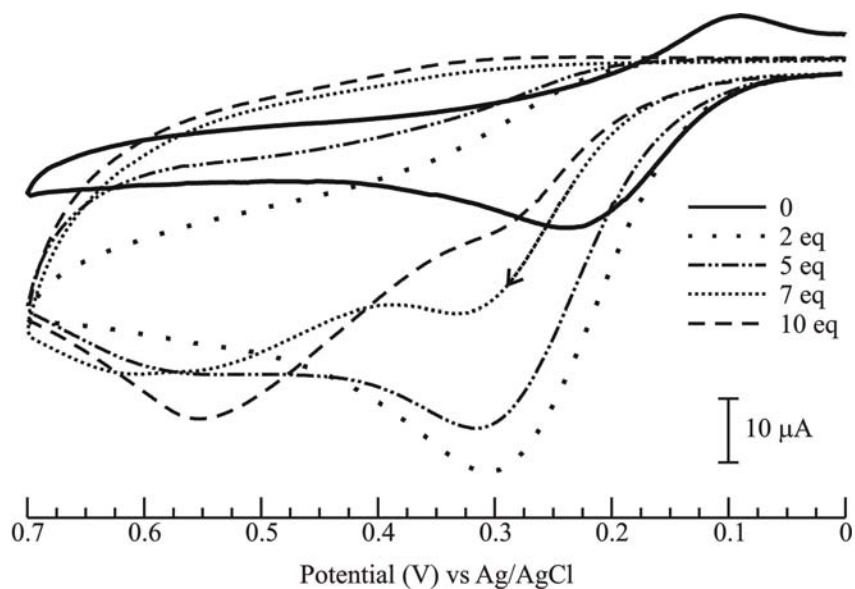

**Figure S-4.** Cyclic voltammograms detailing the response of  $1.0 \times 10^{-3}$  M **2** upon addition of increasing amounts of GSH (0–10 eq) in 70:30 MeOH/H<sub>2</sub>O (0.050 M phosphate buffer, pH 7.3) solution,  $\nu = 0.1 \text{ V}\cdot\text{s}^{-1}$ .

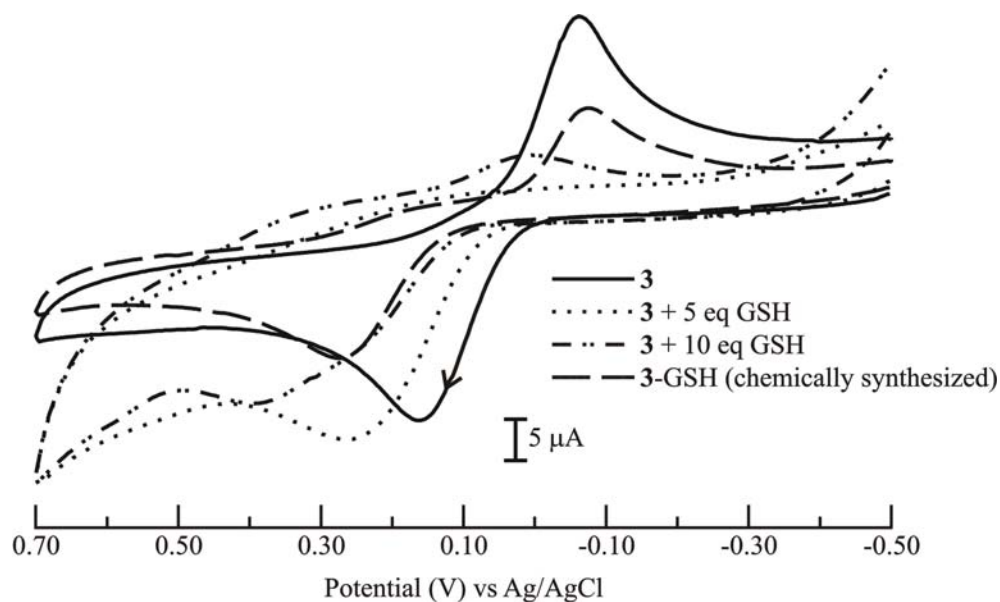

**Figure S-5.** Cyclic voltammetric responses of  $1.0 \times 10^{-3}$  M **3**, the chemically synthesized **3**-GSH adduct, and the electrochemically generated **3**-GSH and **3**-(GSH)<sub>2</sub> adducts in 70:30 MeOH/H<sub>2</sub>O (0.050 M phosphate buffer, pH 7.3) solution,  $\nu = 0.1 \text{ V}\cdot\text{s}^{-1}$ . The behavior of **3** in the presence of 5 eq and 10 eq of GSH is very similar to indicator **1** in Figures 2 and 3.
